# Supplementary material for: Intra-pituitary follicle-stimulating hormone signaling regulates hepatic lipid metabolism in mice
Source: PubMed Central journal article supplement (PMC9968338; doi:10.1038/s41467-023-36681-z), 2023-02-25
Supplement: 41467_2023_36681_MOESM1_ESM.pdf [file 41467_2023_36681_MOESM1_ESM.pdf]

Supplementary Figure 1

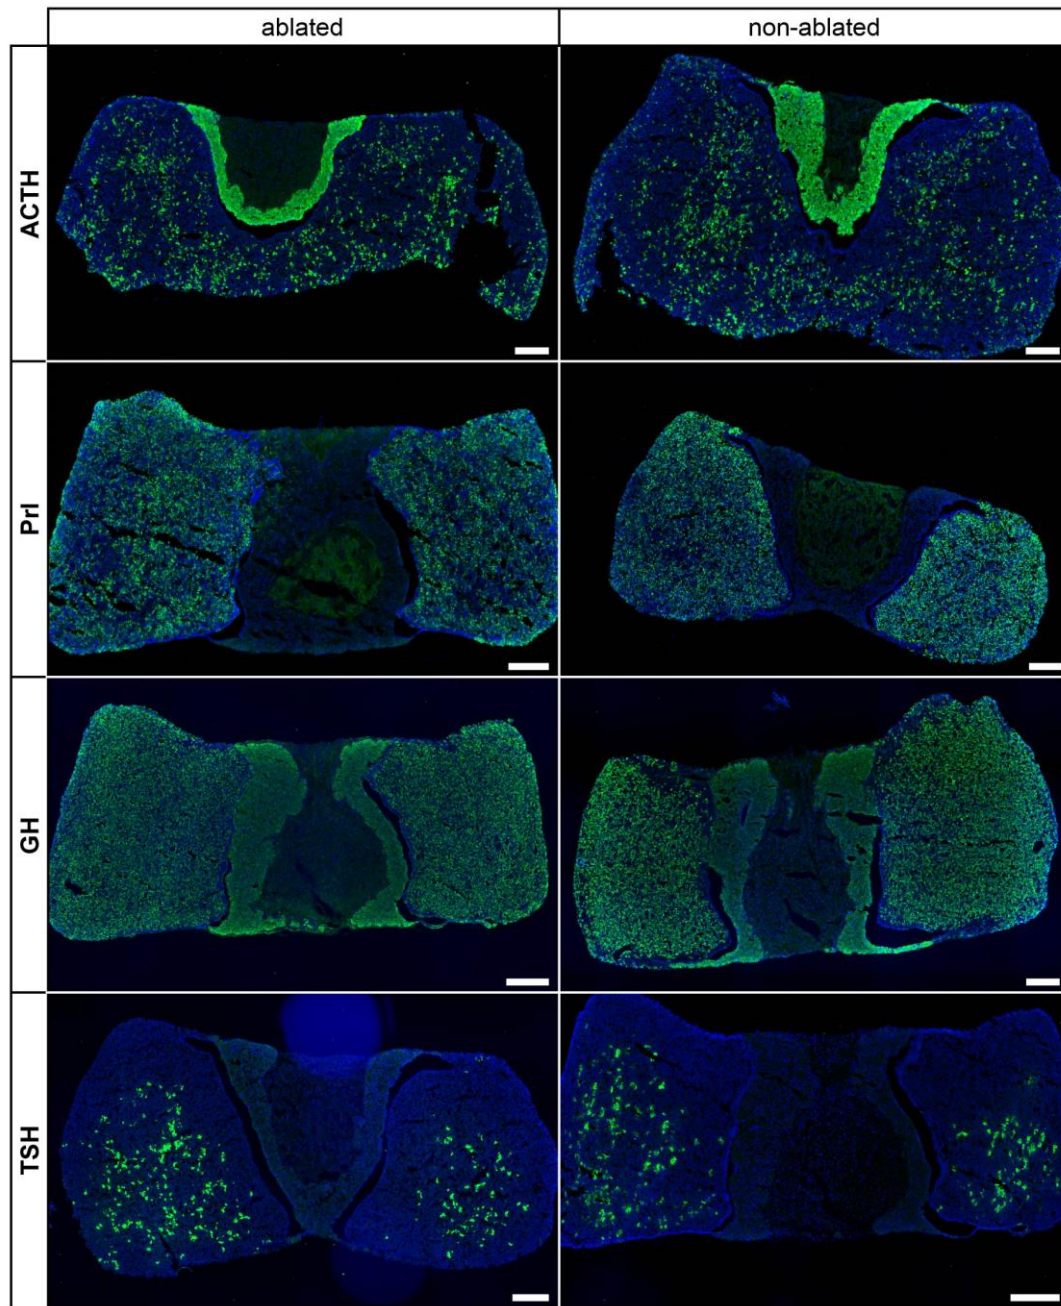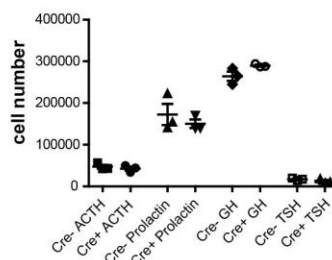

**Supplementary Figure 1. Gonadotrope ablation does not affect other hormone-secreting cell types in the male anterior pituitary gland.** Pituitary hormones (ACTH, adrenocorticotropic hormone; Prl, prolactin; GH, growth hormone; TSH, thyroid-stimulating hormone) were detected in male gonadotrope-ablated (ablated) and control (non-ablated) pituitaries by immunofluorescence analyses (green). Nuclear stain is shown in blue. Scale bars: 200  $\mu$ m. Bottom: Cell numbers were not significantly different between ablated (n=3 animals for each hormone) and non-ablated animals (n=3 animals for each hormone). Error bars represent the standard error of the mean. For statistical details, see Supplementary Data 1. Source data are provided as a Source Data file.

Supplementary Figure 2

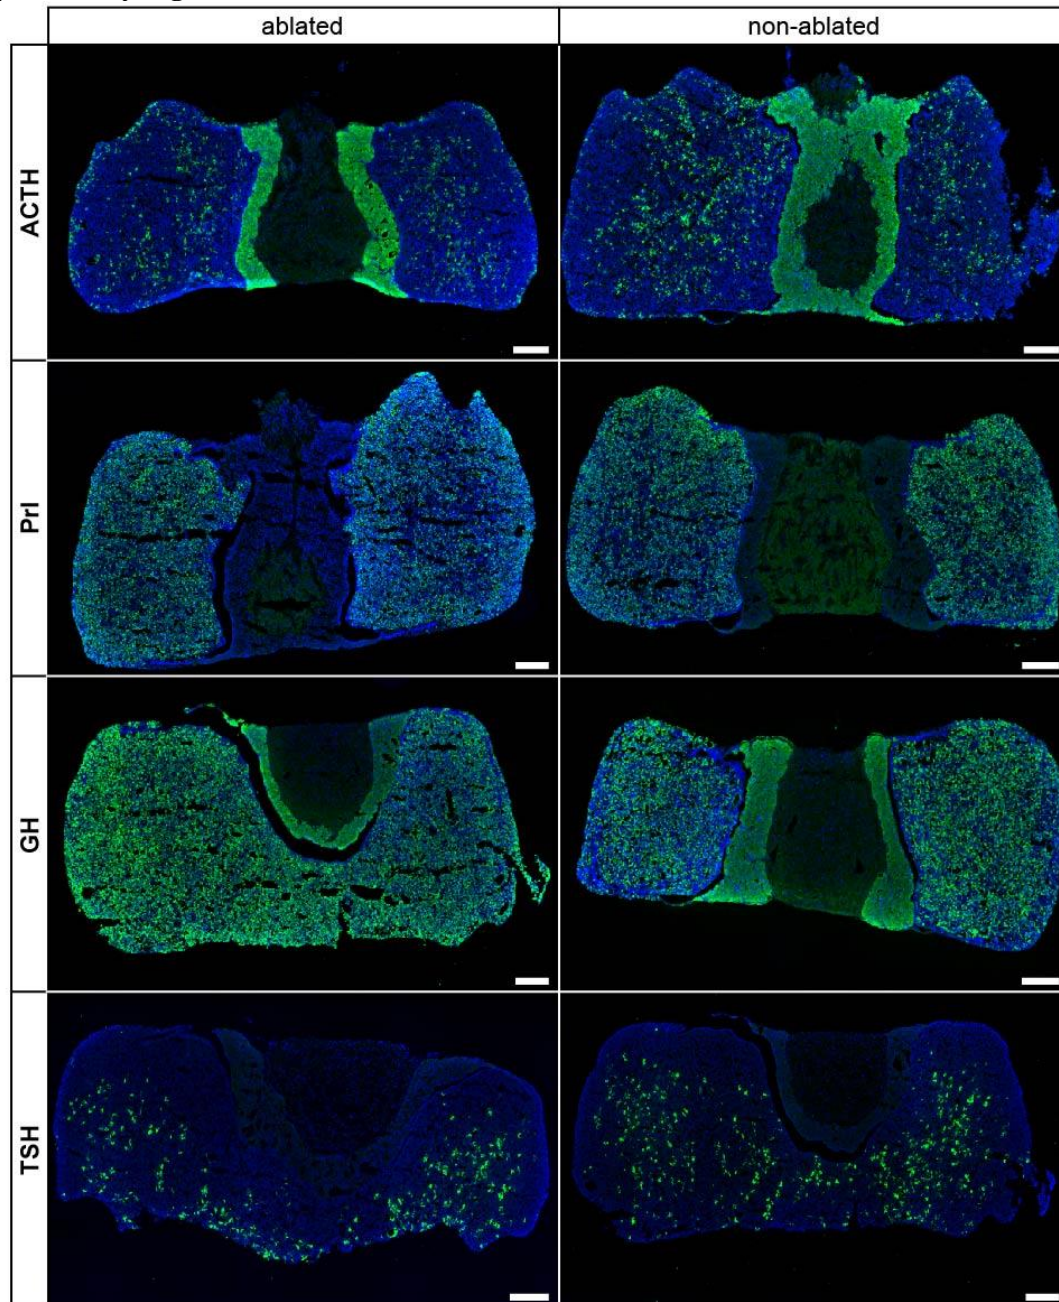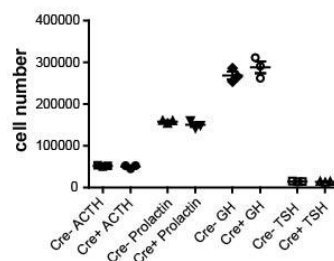

**Supplementary Figure 2. Gonadotrope ablation does not affect other hormone-secreting cell types in the female anterior pituitary gland.** Pituitary hormones (ACTH, adrenocorticotrophic hormone; Prl, prolactin; GH, growth hormone; TSH, thyroid-stimulating hormone) were detected in female gonadotrope-ablated (ablated) and control (non-ablated) pituitaries by immunofluorescence analyses (green). Nuclear stain is shown in blue. Scale bars: 200  $\mu$ m. Bottom: Cell numbers were not significantly different between ablated (n=3 animals for each hormone) and non-ablated (n=3 animals for each hormone) animals. Error bars represent the standard error of the mean. For statistical details, see Supplementary Data 1. Source data are provided as a Source Data file.

### Supplementary Figure 3

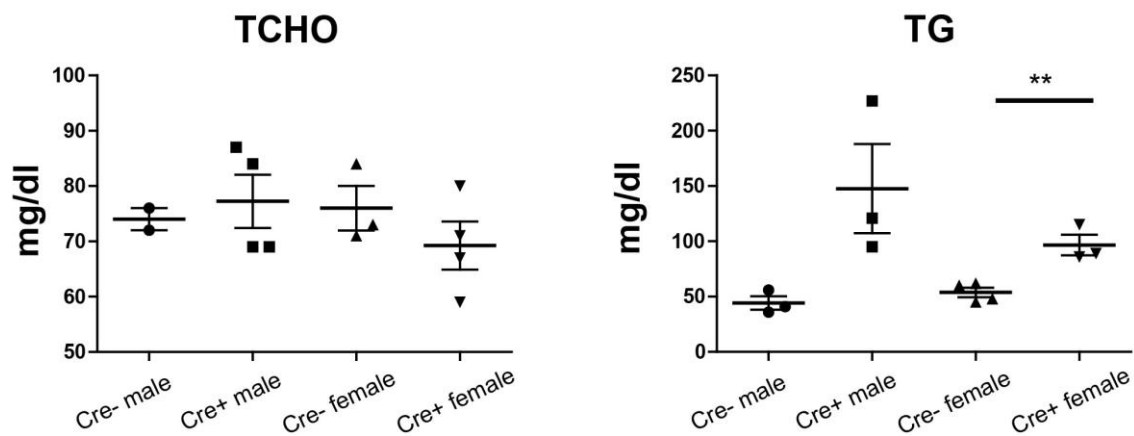

**Supplementary Figure 3. Increased plasma triglyceride levels after gonadotrope ablation in females.** Total cholesterol (TCHO) and triglyceride (TG) plasma levels in ablated (Cre+) vs control (Cre-) male and female mice. (TCHO: n=2 for Cre- male, n=4 for Cre+ male, n=3 for Cre- female, n=4 for Cre+ female. TG: n=3 for Cre- male, n=3 for Cre+ male, n=4 for Cre- female, n=3 for Cre+ female). \*\* = Two-tailed t test p-value 0.0055. For statistical details, see Supplementary Data 1. Source data are provided as a Source Data file.

### Supplementary Figure 4

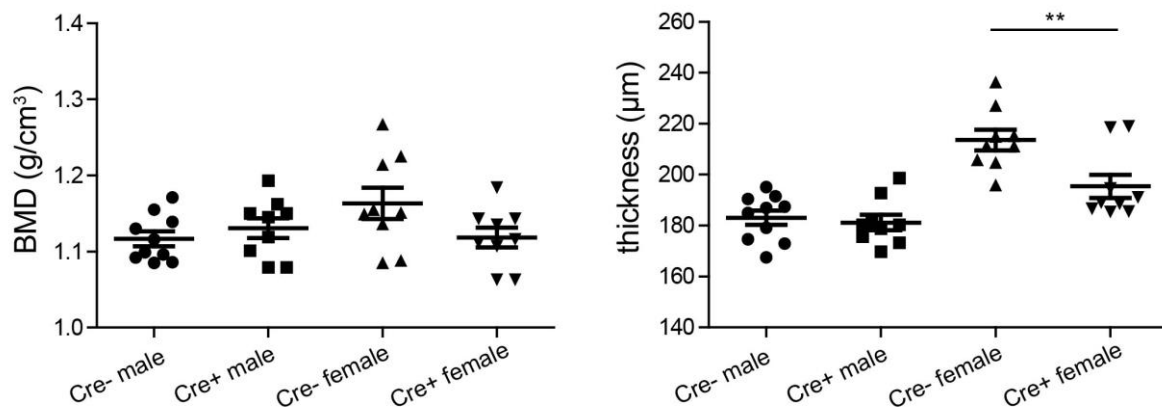

**Supplementary Figure 4. Decreased cortical bone thickness of female femurs after gonadotrope ablation.** Cortical bone mineral density (BMD) and thickness in gonadotrope-ablated (Cre+) and control (Cre-) male (n=10 Cre- males and n=9 Cre+ males for BMD and thickness) and female mice (n=9 for Cre- females and n=9 for Cre+ females for BMD and thickness). Error bars represent the standard error of the mean. \*\* = Two-tailed t test p-value 0.0084. For statistical details, see Supplementary Data 1. Source data are provided as a Source Data file.

### Supplementary Figure 5

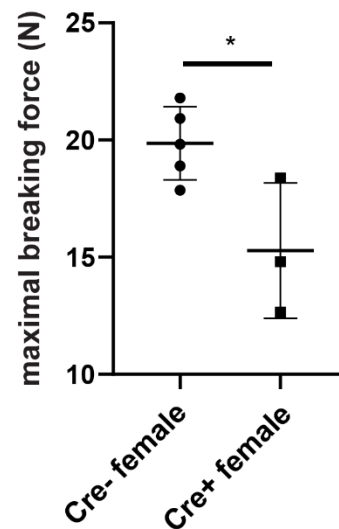

**Supplementary Figure 5. Decreased cortical bone strength of female femurs after gonadotrope ablation.** Maximal breaking force of femurs from gonadotrope-ablated (Cre+, n=3) and control (Cre-, n=5) female mice. Error bars represent the standard error of the mean. \* =  $P < 0.05$ . For statistical details, see Supplementary Data 1. Source data are provided as a Source Data file.

### Supplementary Figure 6

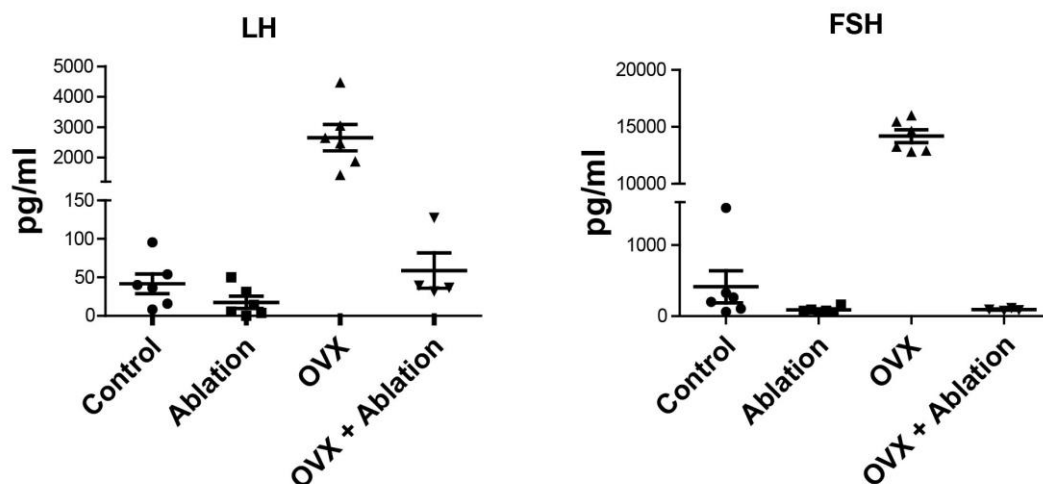

**Supplementary Figure 6. Gonadotrope ablation leads to a massive reduction of LH and FSH plasma levels in ovariectomized females.** Plasma luteinizing hormone (LH) and follicle-stimulating hormone (FSH), levels in control (n=6 animals), gonadotrope-ablated (ablation, n=6 animals), ovariectomized (OVX, n=6 animals), and gonadotrope-ablated ovariectomized (n=4 animals) female mice. Error bars represent the standard error of the mean. \* =  $P < 0.05$ . For statistical details, see Supplementary Data 1. Source data are provided as a Source Data file.



### Supplementary Figure 7

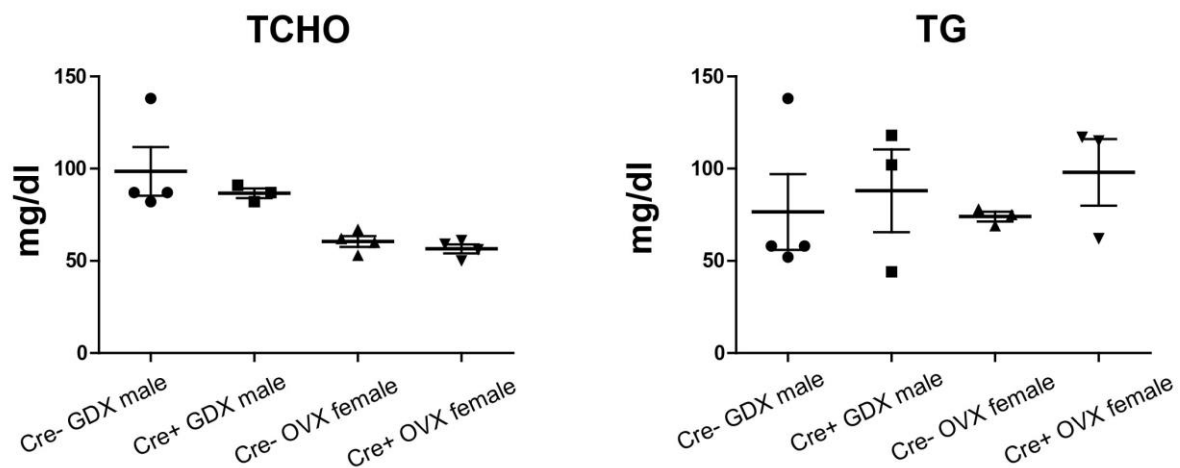

**Supplementary Figure 7. Plasma triglyceride and cholesterol levels after gonad removal in combination with gonadotropin ablation.** Total cholesterol (TCHO) and triglyceride (TG) plasma levels in gonadotropin-ablated mice lacking gonads (Cre+ OVX and Cre+ GDX) vs control (Cre- OVX and Cre- GDX) male and female mice. (TCHO: n=4 for Cre- GDX male, n=3 for Cre+ GDX male, n=4 for Cre- OVX female, n=4 for Cre+ OVX female. TG: n=3 for Cre- GDX male, n=3 for Cre+ GDX male, n=3 for Cre- OVX female, n=3 for Cre+ OVX female). For statistical details, see Supplementary Data 1. Source data are provided as a Source Data file.

### Supplementary Figure 8

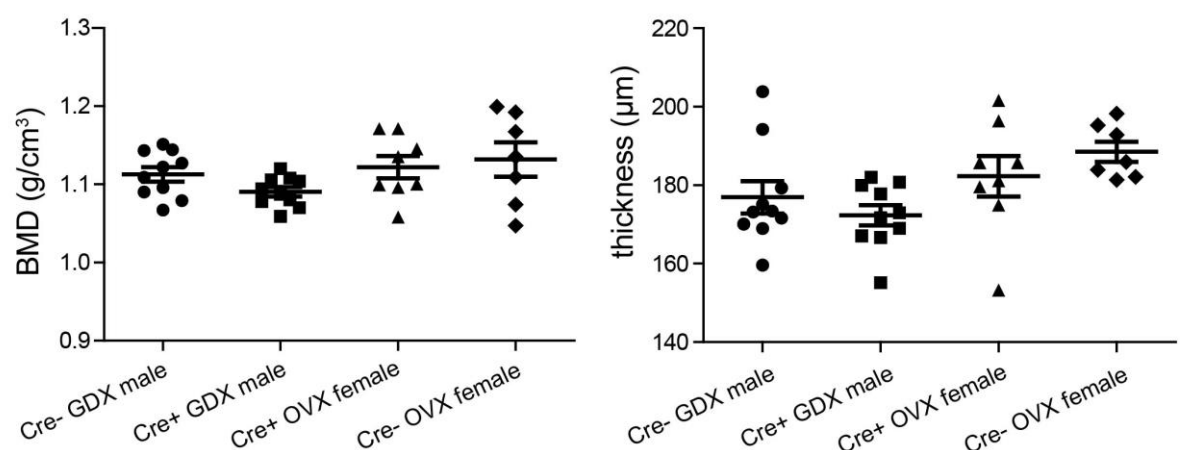

**Supplementary Figure 8. Gonadotropin ablation does not affect cortical bone mineral density and thickness in gonadectomized mice.** Cortical bone mineral density (BMD) and thickness in gonadotropin-ablated (Cre+) and control (Cre-) gonadectomized (GDX, n=10 Cre- males and n=10 Cre+ males for BMD and thickness) male and ovariectomized (OVX, n=7 Cre- males and n=8 Cre+ males for BMD and thickness) female mice. Error bars represent the standard error of the mean. For statistical details, see Supplementary Data 1. Source data are provided as a Source Data file.

### Supplementary Figure 9

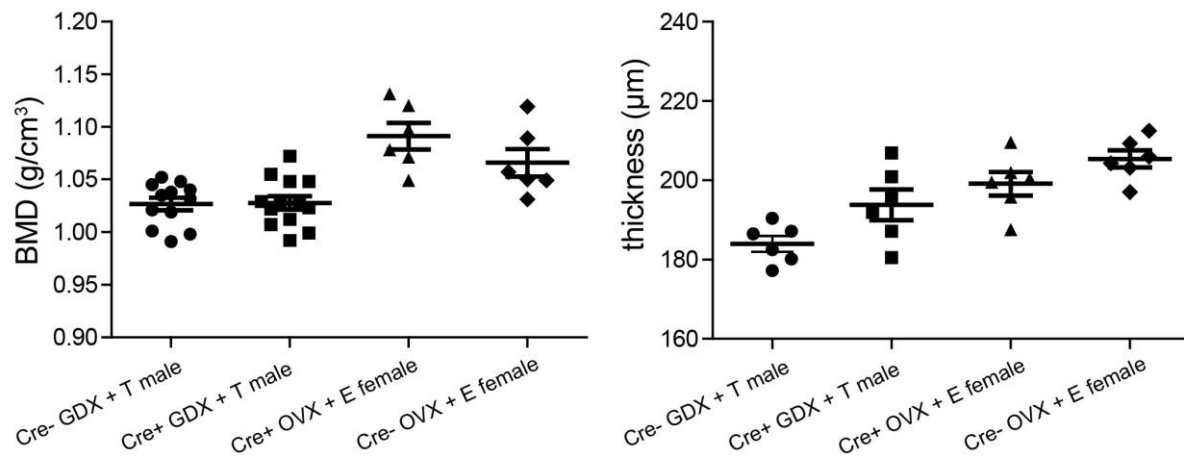

**Supplementary Figure 9. Gonadotrope ablation does not affect cortical bone mineral density and thickness in gonadectomized mice with hormone replacement.** Cortical bone mineral density (BMD) and thickness in gonadotrope-ablated (Cre+) and control (Cre-) gonadectomized (GDX) male and ovariectomized (OVX) female mice with testosterone (T, n=12 Cre- males for BMD and n=6 Cre- males for thickness and n=13 Cre+ males for BMD and n=6 Cre- and n=6 for Cre+ males for thickness) or estradiol (E, n=6 Cre- females and n=6 Cre- females for BMD and thickness) replacement, respectively. Error bars represent the standard error of the mean. For statistical details, see Supplementary Data 1. Source data are provided as a Source Data file.

## Supplementary Figure 10

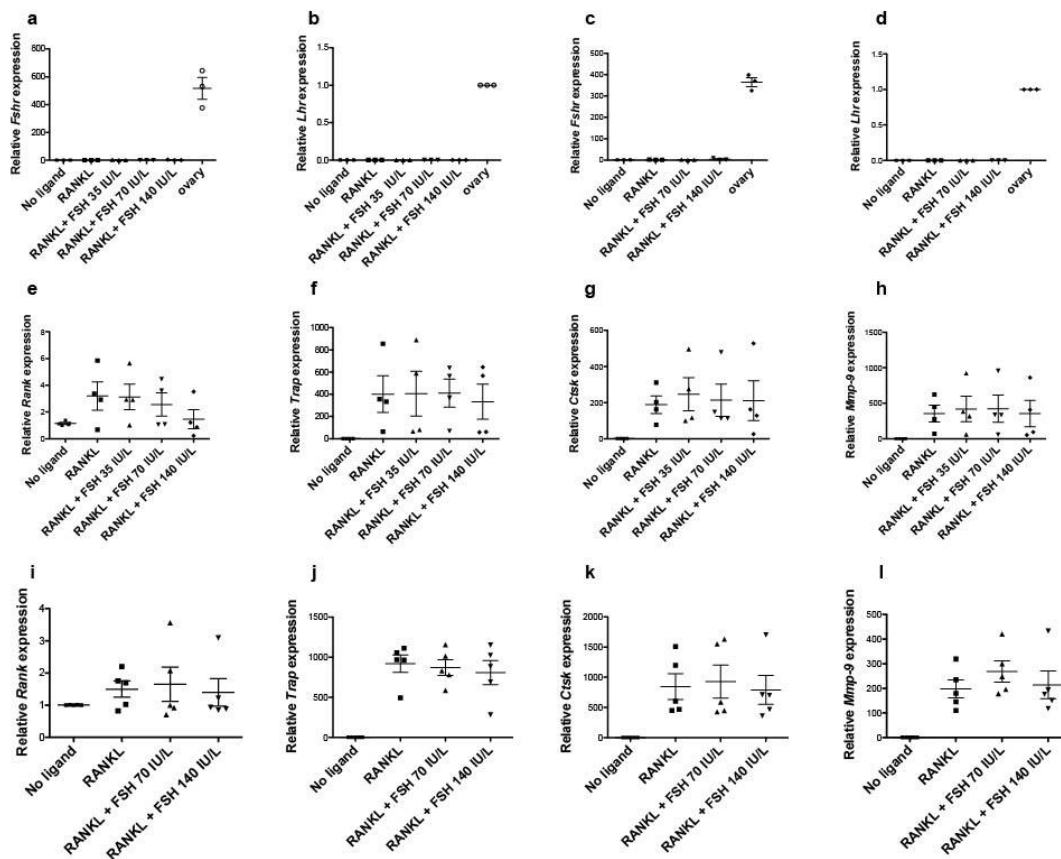

**Supplementary Figure 10. FSH does not affect the expression of osteoclast differentiation markers.** *Fshr* (a) and *Lhcgr* (b) expression levels in RAW 264.7 cells in response to the indicated treatments. Expression levels of *Fshr* (c) and *Lhcgr* (d) in primary murine monocytes under different treatment conditions (note that M-CSF was added in all cases). Ovary RNA was included as a positive control. *Fshr* levels are plotted relative to the no-ligand or M-CSF-only treatment conditions. *Lhcgr* expression levels were plotted relative to ovary as no signal was detected in the cells under any conditions. Expression levels of four osteoclast differentiation markers: receptor activator of nuclear factor  $\kappa$  B (*Rank*) (e), tartrate-resistant acid phosphatase (*Trap*) (f), cathepsin k (*Ctsk*) (g), and matrix metalloproteinase 9 (*Mmp-9*) (h) in RAW 264.7 cells in response to the indicated treatments. Expression levels of *Rank* (i), *Trap* (j), *Ctsk* (k), and *Mmp-9* (l) in primary murine monocytes in response to the different treatments. Error bars represent the standard error of the mean. For statistical details, see Supplementary Data 1. Source data are provided as a Source Data file.

## Supplementary Figure 11

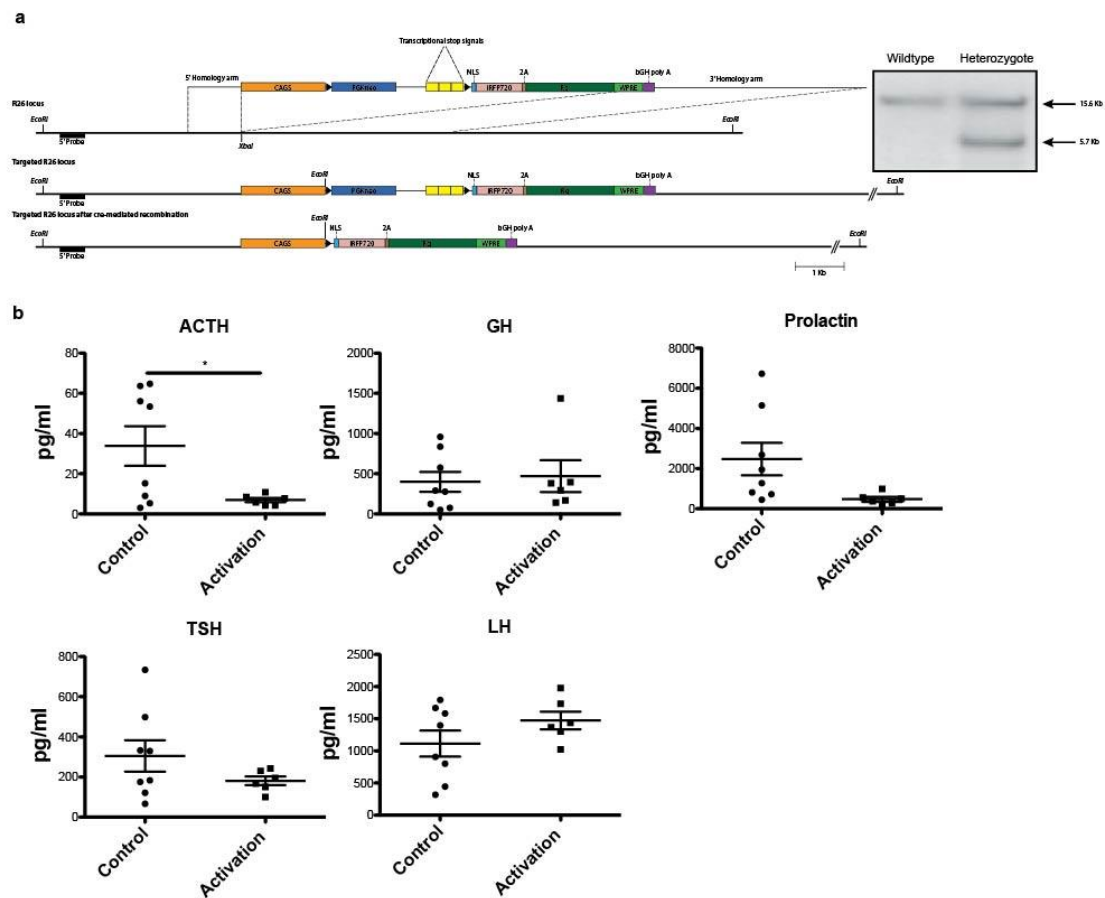

**Supplementary Figure 11. Establishment of a gonadotrope activation mouse model.** Schematic representation of the targeting strategy used to generate a Cre-dependent DREADD allele in the enhanced *ROSA26* locus. Southern blot analysis of genomic DNA from a wild-type and a heterozygous mutant mouse after digestion with *EcoRI* (**a**). **b** Plasma adrenocorticotropic hormone (ACTH), growth hormone (GH), prolactin, thyroid-stimulating hormone (TSH), and LH from CNO-treated Cre<sup>+</sup> (chemogenetically activated) and Cre<sup>-</sup> (control) ovariectomized (OVX) female mice on high fat diet (HFD). Error bars represent standard error mean. \* =  $P < 0.05$ . For statistical details, see Supplementary Data 1. Source data are provided as a Source Data file.



Supplementary Figure 12

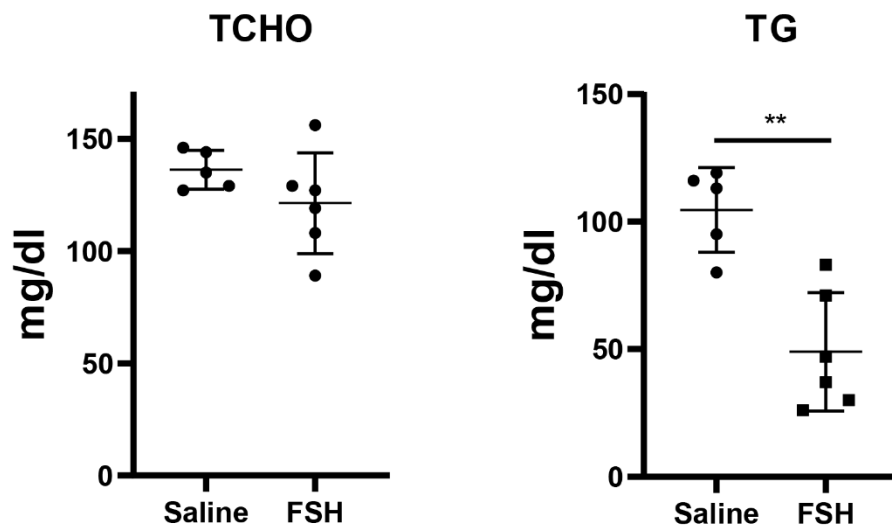

**Supplementary Figure 12. Reduced plasma triglyceride levels after FSH treatment.** Total cholesterol (TCHO) and triglyceride (TG) levels in FSH (n=6 animals for TCHO and TG)- or saline-treated (n=5 animals for TCHO and TG) OVX/HFD females. Error bars represent standard error mean. \*\* = P < 0.01. For statistical details, see Supplementary Data 1. Source data are provided as a Source Data file.

### Supplementary Figure 13

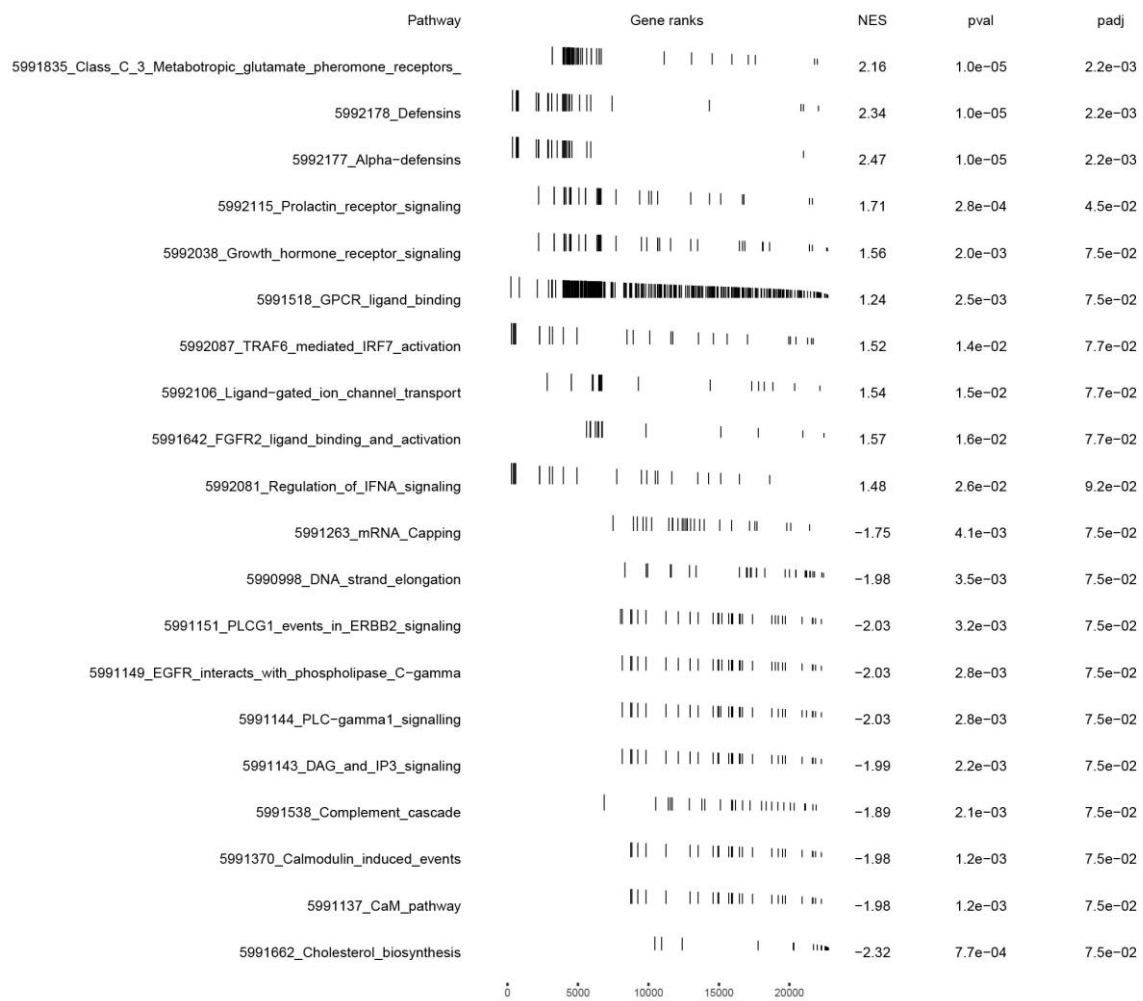

**Supplementary Figure 13. Pathway analysis of RNA-seq data after FSH treatment.** Gene sets enrichment analysis (GSEA) in transcriptome data of livers prepared from FSH-treated compared to saline treated OVX/HFD females. Source data are provided as a Source Data file.

## Supplementary Figure 14

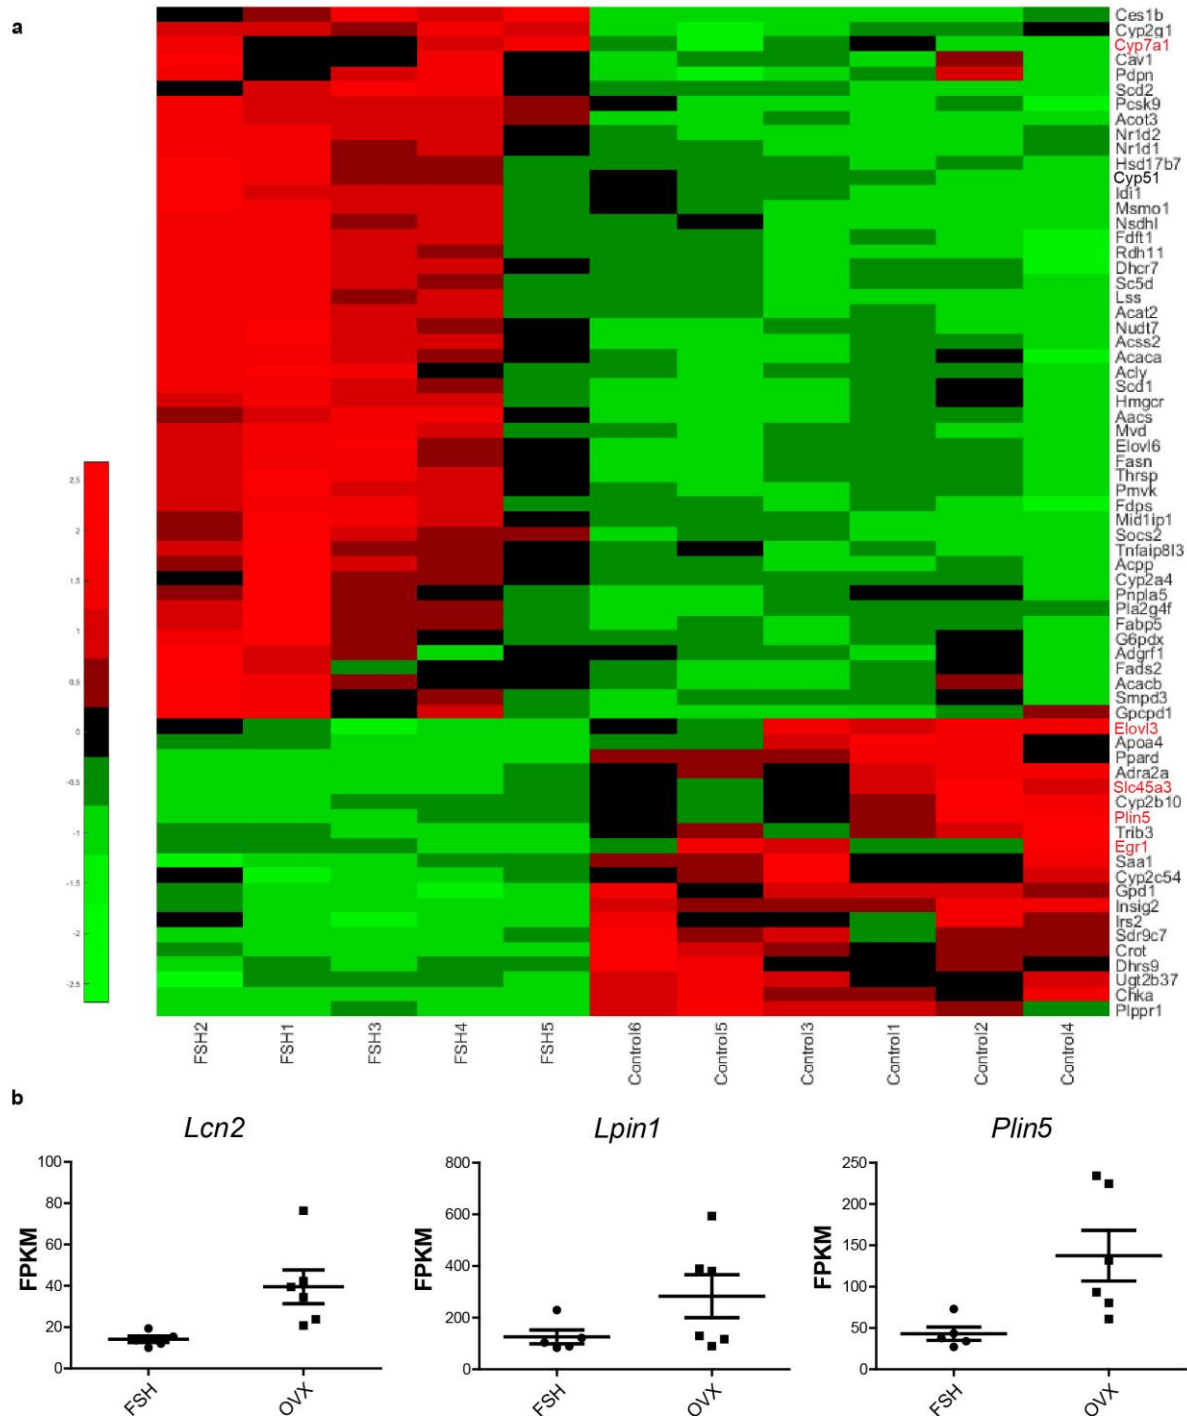

**Supplementary Figure 14. Changes in gene expression upon FSH treatment.** **a** Heatmap showing differential gene expression between FSH-treated (FSH/OVX/HFD) and control (OVX/HFD) female mice. Genes marked in red are known to be involved in control of either lipid biosynthetic or catabolic processes. **b** FPKM values for *LCN2* (n=5 animals for FSH treated and n=6 animals for controls), *Lpin1* (n=5 animals for FSH treated and n=6 animals for controls) and *Plin5* (n=5 animals for FSH treated and n=6 animals for controls) in transcriptome data of livers prepared from FSH-treated OVX/HFD females compared to controls (OVX/HFD). Error bars represent standard error mean. For statistical details, see Supplementary Data 1. Source data are provided as a Source Data file.

## Supplementary Figure 15

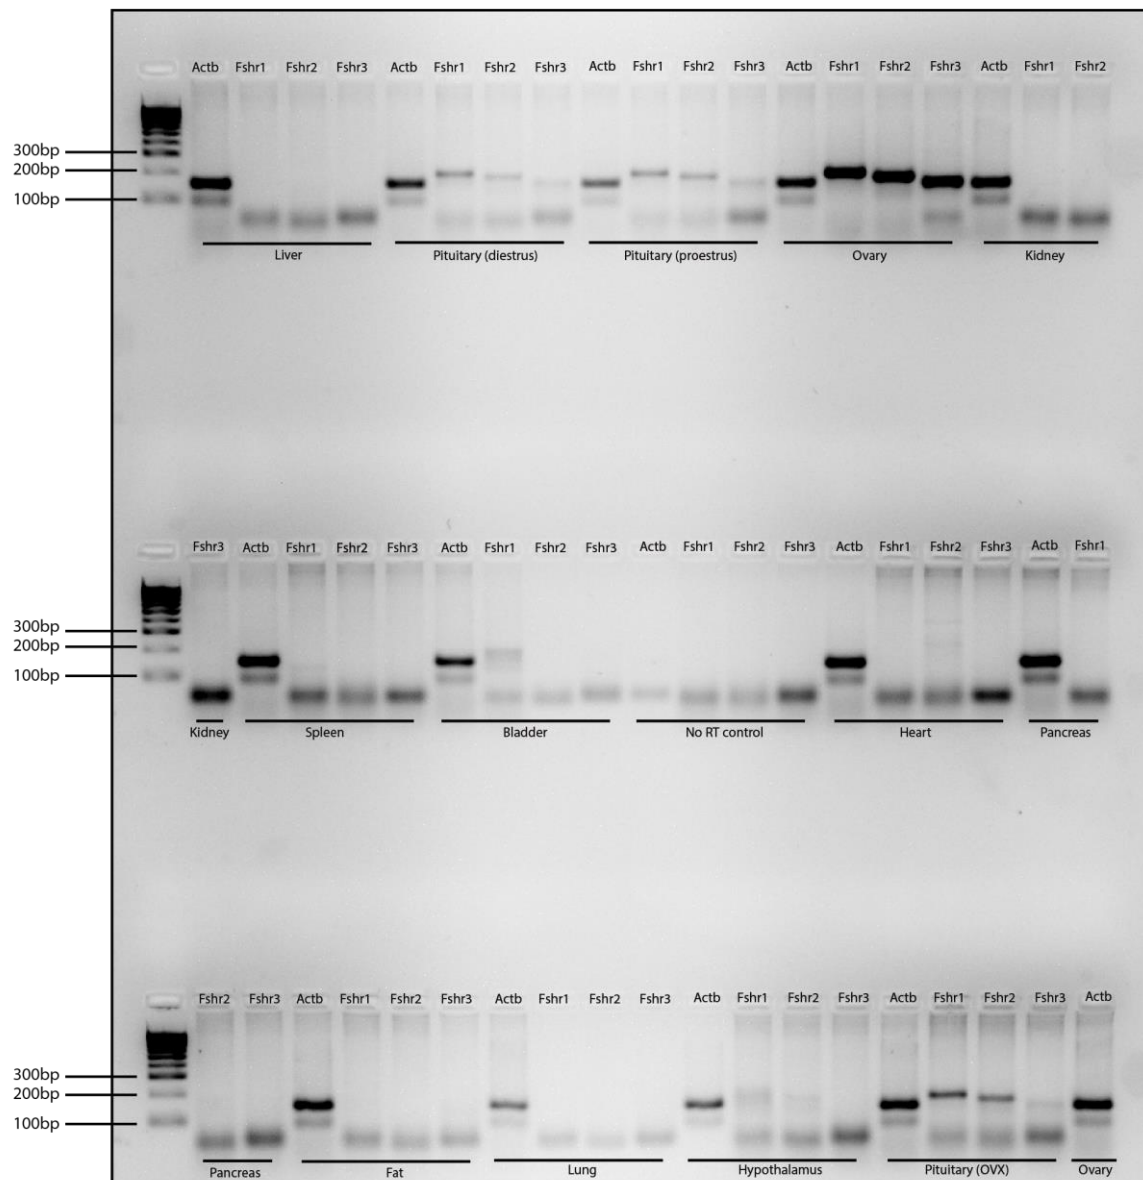

**Supplementary Figure 15. Representative RT-PCR analyses of *Fshr* from major organs of adult female mice.** Three pairs of primers against *Fshr* were used (Fshr1, Fshr2, Fshr3; see Supplementary Table 1). Shown is a representative gel from one animal. In total n=3 animals were used for liver and pituitary and n=2 animals for the other organs. *Actb*; beta actin was used as a positive control. OVX; ovariectomy.

## Supplementary Figure 16

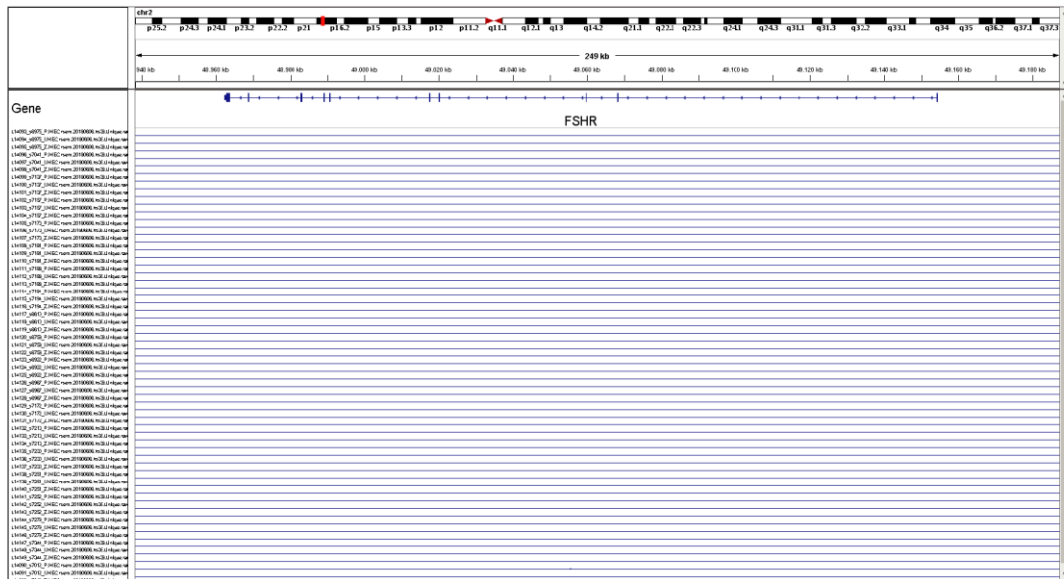

**Supplementary Figure 16. Revisiting a published database to identify the expression of FSH receptor in human liver.** Detailed genomic view of *FSHR* from RNA-seq data. The IGV browser was used to visualize the genomic loci of *FSHR*. Data were extracted from a published human liver RNA-seq database (GSE105127). In total, 19 donors were used (6 males, 13 females). No reads were mapped in this region.

## Supplementary Figure 17

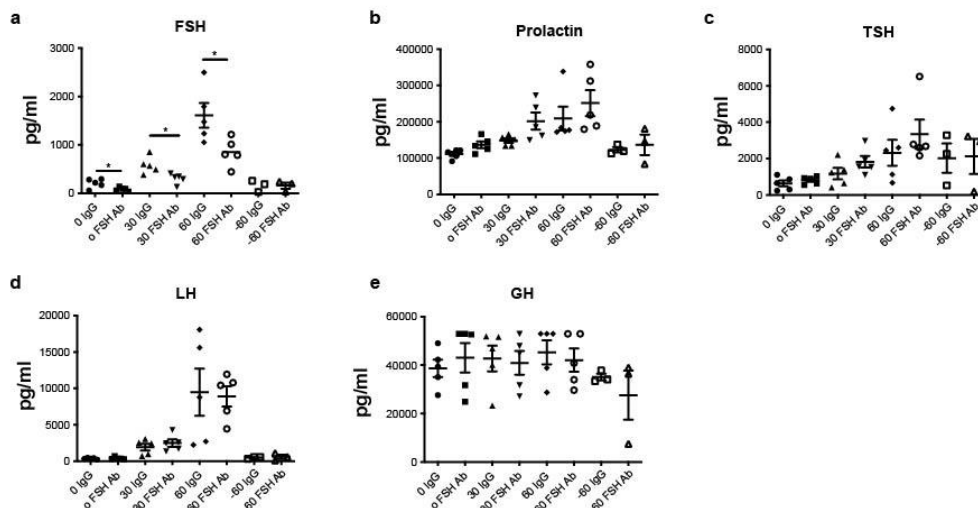

**Supplementary Figure 17. *In vitro* pituitary assay analysing effects of FSH antagonism on pituitary hormone secretion.** FSH (a), prolactin (b), TSH (c), LH (d), and GH (e) levels quantified from *in vitro* GnRH-stimulated pituitaries incubated with an anti-FSH antibody or IgG (control), also see experimental paradigm as shown in Fig. 5c. Error bars represent standard error mean. \* =  $P < 0.05$ . For statistical details, see Supplementary Data 1. Source data are provided as a Source Data file.

### Supplementary Figure 18

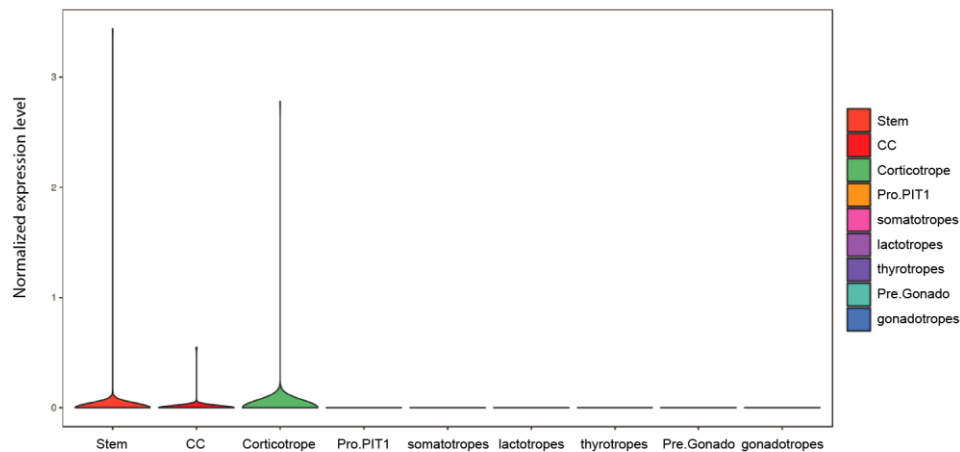

**Supplementary Figure 18. Revisiting a published database to identify the expression of FSH receptor in human pituitary.** Cell types are shown as follows: stem cells (Stem), cycling cells (CC), corticotropes, progenitors of the PIT-1 lineage (Pro.PIT1), somatotropes, lactotropes, thyrotropes, precursors of gonadotropes (Pre.Gonado) and gonadotropes. Data were extracted from a published single cell RNA-seq database from human pituitary (GSE142653).

### Supplementary Figure 19

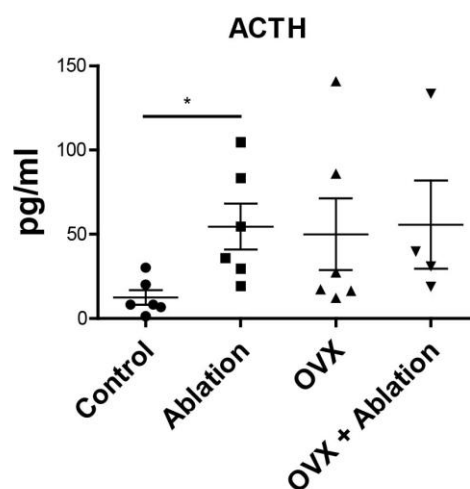

**Supplementary Figure 19. Elevated ACTH plasma levels after gonadotrope ablation.** Plasma adrenocorticotropic hormone (ACTH) from control, gonadotrope-ablated (ablation), ovariectomized (OVX), and gonadotrope-ablated ovariectomized female mice. Error bars represent the standard error of the mean. \* =  $P < 0.05$ . For statistical details, see Supplementary Data 1. Source data are provided as a Source Data file.



Supplementary Figure 20

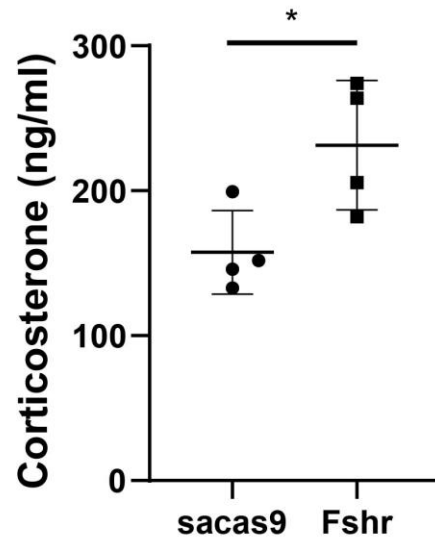

**Supplementary Figure 20. Elevated corticosterone levels in pituitary-specific FSHR knock-out females.** Plasma corticosterone levels in female mice injected with guide RNA against follicle-stimulating hormone receptor (Fshr) compared to controls. Error bars represent the standard error of the mean. \* =  $P < 0.05$ , For statistical details, see Supplementary Data 1. Source data are provided as a Source Data file.

## Supplementary Figure 21

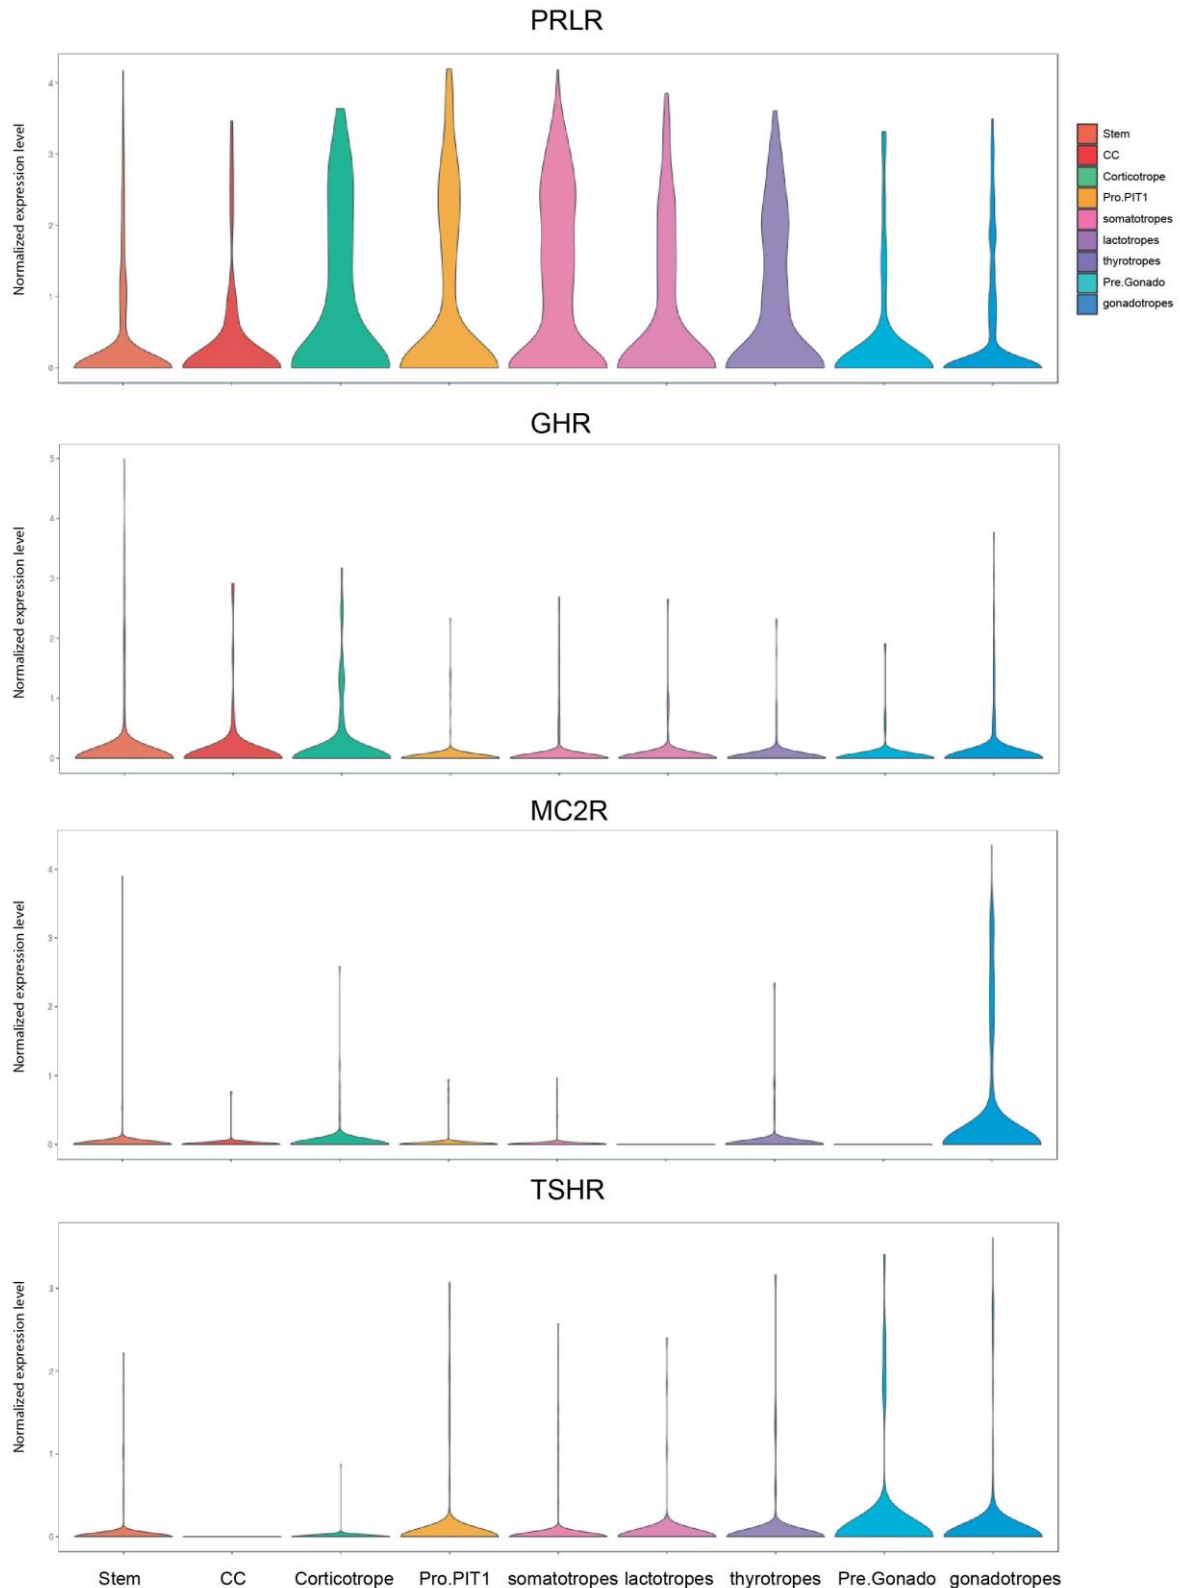

**Supplementary Figure 21. Revisiting a published database to identify the expression of hormone receptors in human pituitary.** Cell types are shown as follows: stem cells (Stem), cycling cells (CC), corticotropes, progenitors of the PIT-1 lineage (Pro.PIT1), somatotropes, lactotropes, thyrotropes, precursors of gonadotropes (Pre.Gonado) and gonadotropes). Different hormone receptors are shown as follows: prolactin receptor (PRLR), growth hormone receptor (GHR), ACTH receptor (MC2R), thyroid-stimulating hormone receptor (TSHR). Data were extracted from a published single cell RNA-seq database from human pituitary (GSE142653).

Supplementary Figure 22

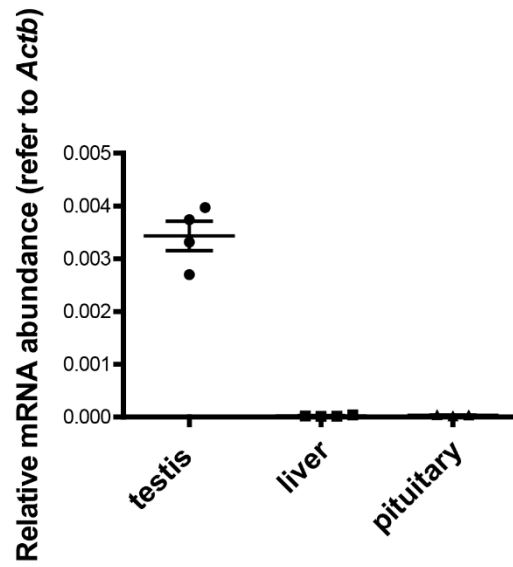

**Supplementary Figure 22. The *Fshr* is not expressed in the male pituitary gland.** Expression levels of *Fshr* in the testis (n=4 animals), liver (n=4 animals), and pituitary (n=4 animals) from adult male mice were measured using RT-qPCR. Error bars represent standard error mean. For statistical details, see Supplementary Data 1. Source data are provided as a Source Data file.

Supplementary Table 1

| RT-PCR Primers for Supplementary Fig. 15                    | Sequence 5'-3'                       |
|-------------------------------------------------------------|--------------------------------------|
| <i>Fshr</i> F1                                              | TGG GCC AGT CGT TTT AGA CA           |
| <i>Fshr</i> R1                                              | CCT CCA GTT TGC AAA GGC AC           |
| <i>Fshr</i> F2                                              | GGT CTA TTC CCT GCC CAA CC           |
| <i>Fshr</i> R2                                              | GTT CAG AGG TTT GCC GCC T            |
| <i>Fshr</i> F3                                              | ACA ACT GTG CAT TCA ACG GAA CC       |
| <i>Fshr</i> R3                                              | CAT GGT TGG GCA GGG AAT AGA CC       |
| <i>Actb</i> F                                               | AAG GAG ATT ACT GCT CTG GCT<br>CCT A |
| <i>Actb</i> R                                               | ACT CAT CGT ACT CCT GCT TGC<br>TGA T |
| RT-qPCR Primers for Fig. 5b and<br>Supplementary Fig. 22    |                                      |
| <i>Fshr</i> F                                               | GGT CTA TTC CCT GCC CAA CC           |
| <i>Fshr</i> R                                               | GTT CAG AGG TTT GCC GCC T            |
| <i>Actb</i> F                                               | AAG GAG ATT ACT GCT CTG GCT<br>CCT A |
| <i>Actb</i> R                                               | ACT CAT CGT ACT CCT GCT TGC<br>TGA T |
| Primers for CRISPR efficiency verification in<br>Fig. 6b, c |                                      |
| <i>Fshr</i> F                                               | GCT ATG ATC CTT GTT CAT CTC TCC      |
| <i>Fshr</i> R                                               | GAC TCT TGA GAA GGA TAG ACA<br>TCT G |
| RT-qPCR Primers for Supplementary Fig. 10                   |                                      |
| <i>Ctsk</i> F                                               | CGA AAA GAG CCT AGC GAA CAG A        |
| <i>Ctsk</i> R                                               | CGC CGA GAG ATT TCA TCC ACC          |
| <i>Fshr</i> F                                               | TGT GCT CAC CAA GCT TCG AGT          |
| <i>Fshr</i> R                                               | TGC AAG TTG GGT AGG TTG GAG A        |
| <i>Lhr</i> F                                                | TGT AAC ACA GGC ATC CGG A            |
| <i>Lhr</i> R                                                | CGT CCC ATT GAA TGC ATG G            |
| <i>Mmp-9</i> F                                              | CGC TCA TGT ACC CGC TGT AT           |
| <i>Mmp-9</i> R                                              | CCG TGG GAG GTA TAG TGG GA           |
| <i>Rank</i> F                                               | TGC AGC TCA ACA AGG ATA CGG          |
| <i>Rank</i> R                                               | TGA TTC CGT TGT CCC CTG GT           |
| <i>Rpl19</i> F                                              | CGG GAA TCC AAG AAG ATT GA           |
| <i>Rpl19</i> R                                              | TTC AGC TTG TGG ATG TGC TC           |
| <i>Trap</i> F                                               | GAG GAC GTG TTC TCT GAC CG           |
| <i>Trap</i> R                                               | GTT GCC ACA CAG CAT CAC TG           |

Supplementary Table 1. List of RT-PCR Primers used in this study.

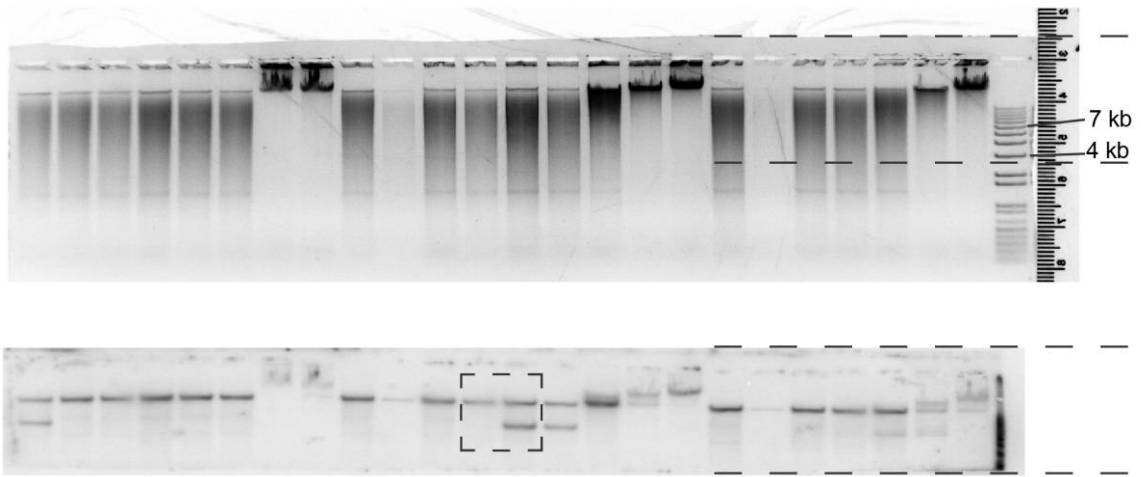

**Uncropped Southern Blot from Supplementary Figure 11a.** Upper Figure depicts the gel before blotting. Stitched box in the lower blot shows cropped image shown in Supplementary Figure 11a.
