# Supplementary material for: Intra-pituitary follicle-stimulating hormone signaling regulates hepatic lipid metabolism in mice
Source: PubMed Central journal article supplement (PMC9968338; doi:10.1038/s41467-023-36681-z), 2023-02-25
Supplement: 41467_2023_36681_MOESM2_ESM.pdf [file 41467_2023_36681_MOESM2_ESM.pdf]

## **Description of Additional Supplementary Files**

File Name: Supplementary Data 1

Description: Statistical information for all experiments.
